# Supplementary material for: A Pectin-Rich, Baobab Fruit Pulp Powder Exerts Prebiotic Potential on the Human Gut Microbiome In Vitro
Source: Microorganisms. 2021 Sep 17;9(9):1981. doi: 10.3390/microorganisms9091981 (PMC8467054; doi:10.3390/microorganisms9091981)
Supplement: Supplementary file 1 [file microorganisms-09-01981-s001.zip › microorganisms-1339024-supplementary.pdf]

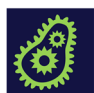

**Table S1.** Nutritional composition of tested baobab fruit pulp powder. TDF = total dietary fiber, WSS-PS = water soluble solid-polysaccharide, WUS-PS = water unextractable solids.

| Parameter                                    | Baobab Powder |
|----------------------------------------------|---------------|
| Dry mass (%)                                 | 93            |
| Starch (% of dry mass)                       | 2.7           |
| Starch (% of total mass)                     | 2.5           |
| Protein (% of dry mass)                      | 2.8           |
| Protein (% of total mass)                    | 2.6           |
| Glucose, fructose, sucrose (% of dry mass)   | 35            |
| Glucose, fructose, sucrose (% of total mass) | 33            |
| TDF (% of dry mass)                          | 66            |
| WSS-PS (% of dry mass)                       | 50.5          |
| WSS-PS (% of total mass)                     | 47            |
| WUS-PS (% of dry mass)                       | 13            |
| Pectin (% of dry mass)                       | 42.5          |
